# Supplementary material
Source: PubMed Central journal article supplement (PMC4318625)
Supplement: ac504516k_si_001.pdf [file ac504516k_si_001.pdf]

## Supporting Information

### Significant Accumulation of Polymyxin in Single Renal Tubular Cells: A Medicinal Chemistry and Triple Correlative Microscopy Approach

Mohammad A. K. Azad<sup>†</sup>, Kade D. Roberts<sup>†‡</sup>, Heidi H. Yu<sup>†</sup>, Boyin. Liu<sup>§</sup>, Alice V. Schofield<sup>†</sup>, Simon A. James<sup>||</sup>, Daryl L. Howard<sup>||</sup>, Roger L. Nation<sup>†</sup>, Kelly Rogers<sup>⊥</sup>, Martin D. de Jonge<sup>||</sup>, Philip E. Thompson<sup>‡</sup>, Jing Fu<sup>§¶</sup>, Tony Velkov<sup>†¶</sup>, Jian Li<sup>\*†¶</sup>

<sup>†</sup>Drug Delivery, Disposition and Dynamics, Monash Institute of Pharmaceutical Sciences, Monash University, Parkville, Victoria 3052, Australia

<sup>‡</sup>Medicinal Chemistry, Monash Institute of Pharmaceutical Sciences, Monash University, Victoria 3052, Australia

<sup>§</sup>Department of Mechanical and Aerospace Engineering, Monash University, Clayton, Victoria 3800, Australia

<sup>||</sup>Australian Synchrotron, Clayton, Victoria 3168, Australia

<sup>⊥</sup>Centre for Dynamic Imaging, Walter & Eliza Hall Institute of Medical Research, Parkville, Victoria 3052, Australia

<sup>¶</sup>Joint senior authors.

\*Corresponding Author

E-mail: Colistin.Polymyxin@gmail.com

#### Contents

1. Figure S1
2. Figure S2

**Figure S1:** Fluorescence spectra illustrating the concentration-dependent enhancement of fluorescence emission of FADDI-096 in water.

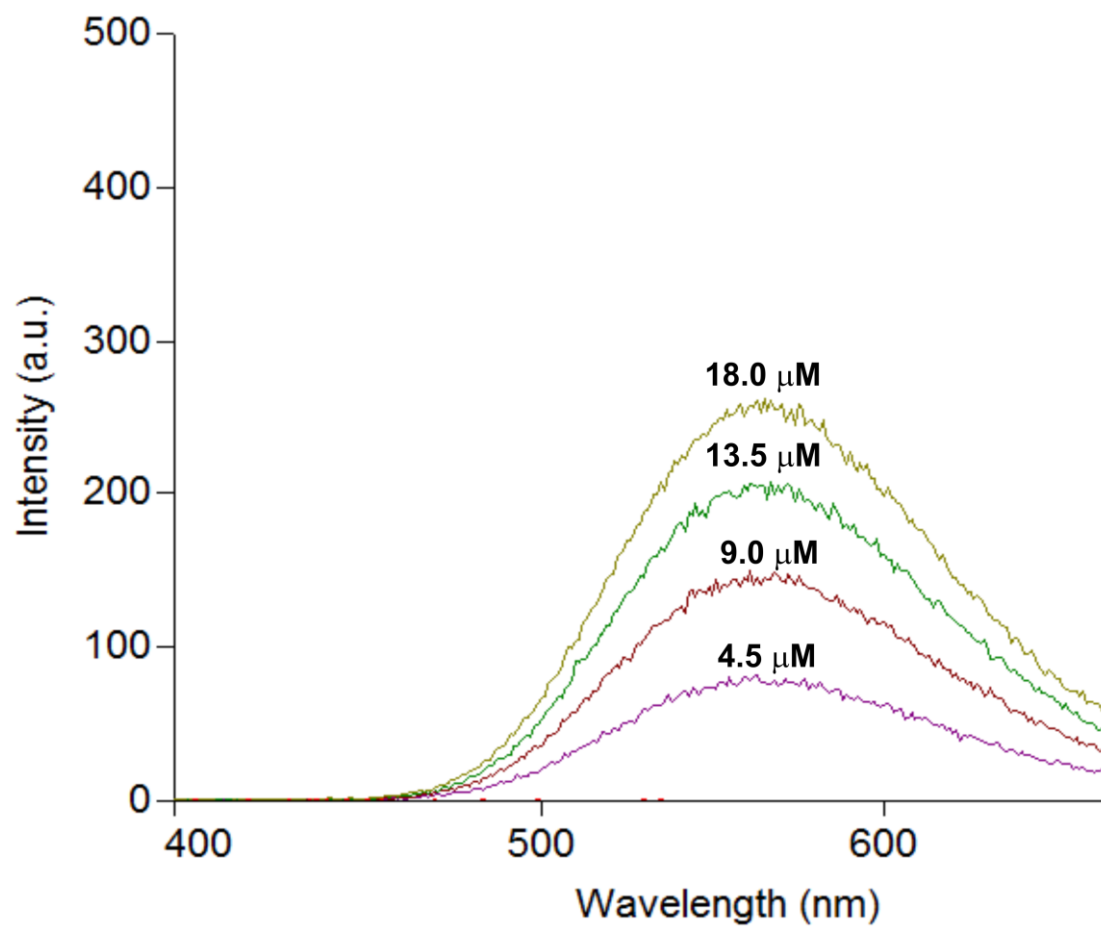

**Figure S2:** Distribution of elements (Ca, Cl, Cu, Fe, K, P, S and Zn) in single NRK-52E and HK-2 cells determined with X-ray fluorescence microscopy (XFM). a) NRK-52E cells (i) without treatment, (ii) treated with 5  $\mu\text{M}$  FADDI-096 for 4 h, (iii) treated with 50  $\mu\text{M}$  FADDI-096 for 1 h, (iv) treated with 50  $\mu\text{M}$  FADDI-096 for 4 h; and HK-2 cells (v) without treatment, (vi) treated with 10  $\mu\text{M}$  FADDI-096 for 4 h. Signal intensities are scaled separately for each element shown from zero to the maximum value; the numbers at the top of the relevant panels note the maximum pixel value ( $\mu\text{g}/\text{cm}^2$ ) in each sample. Scale: 10  $\mu\text{m}$ . Similar elemental distributions were observed previously.<sup>1-4</sup> (b) Accumulation of elements in single NRK-52E and HK-2 cells as described in panel a, measured using XFM (mean  $\pm$  SD; n = 10).

Figure S2:

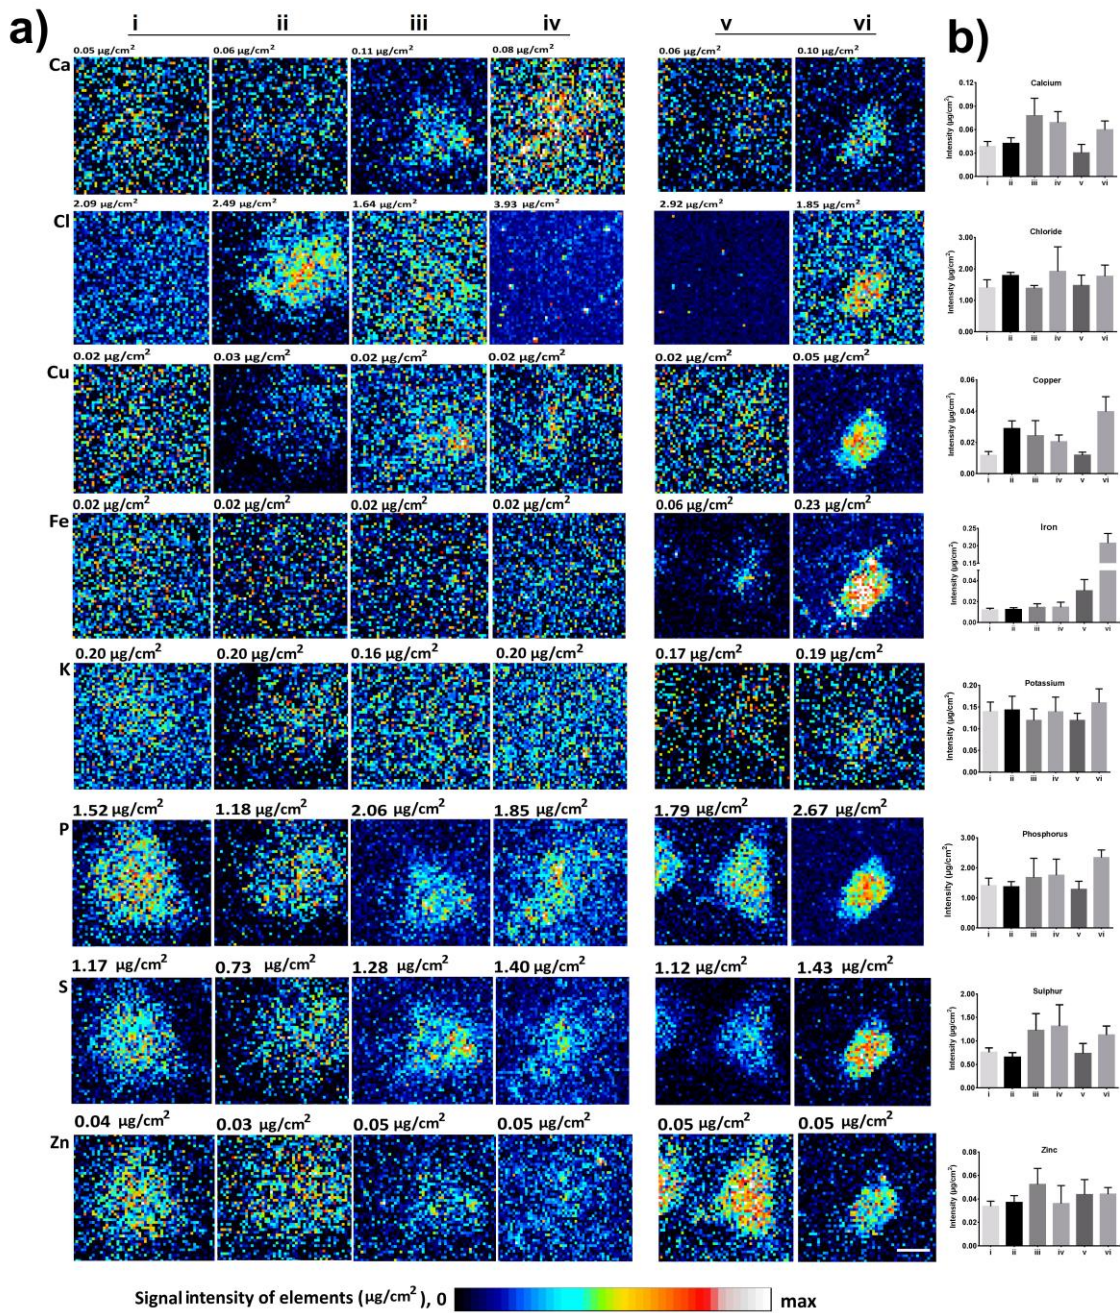

## References:

- (1) Dillon, C. T. *Aust. J. Chem.* **2012**, *65*, 204-217.
- (2) Vogt, S.; Lai, B.; Finney, L.; Palmer, B.; Wu, L. E.; Harris, H.; Paunesku, T.; de Jonge, M.; Legnini, D.; Maser, J.; Glesne, D.; Lay, P.; Woloschak, G. *Microsc. Microanal.* **2007**, *13*, 40-41.
- (3) Finney, L.; Mandava, S.; Ursos, L.; Zhang, W.; Rodi, D.; Vogt, S.; Legnini, D.; Maser, J.; Ikpatt, F.; Olopade, O. I.; Glesne, D. *Proc. Natl. Acad. Sci. U.S.A.* **2007**, *104*, 2247-2252.
- (4) James, S. A.; Feltis, B. N.; de Jonge, M. D.; Sridhar, M.; Kimpton, J. A.; Altissimo, M.; Mayo, S.; Zheng, C. X.; Hastings, A.; Howard, D. L.; Paterson, D. J.; Wright, P. F. A.; Moorhead, G. F.; Turney, T. W.; Fu, J. *ACS Nano.* **2013**, *7*, 10621-10635.
